# Supplementary material for: Protocol for a scoping review of how people with ME/CFS use the internet
Source: HighWire-hosted journal article supplement (doi:10.1136/bmjopen-2023-076904), 2024-01-01
Supplement: bmjopen-2023-076904supp004_data_supplement.pdf [file bmjopen-2023-076904supp004_data_supplement.pdf]

Part I: Mixed Methods Appraisal Tool (MMAT), version 2018

| Category of study designs                    | Methodological quality criteria                                                                                                         | Responses |    |            |          |
|----------------------------------------------|-----------------------------------------------------------------------------------------------------------------------------------------|-----------|----|------------|----------|
|                                              |                                                                                                                                         | Yes       | No | Can't tell | Comments |
| Screening questions (for all types)          | S1. Are there clear research questions?                                                                                                 |           |    |            |          |
|                                              | S2. Do the collected data allow to address the research questions?                                                                      |           |    |            |          |
|                                              | <i>Further appraisal may not be feasible or appropriate when the answer is 'No' or 'Can't tell' to one or both screening questions.</i> |           |    |            |          |
| 1. Qualitative                               | 1.1. Is the qualitative approach appropriate to answer the research question?                                                           |           |    |            |          |
|                                              | 1.2. Are the qualitative data collection methods adequate to address the research question?                                             |           |    |            |          |
|                                              | 1.3. Are the findings adequately derived from the data?                                                                                 |           |    |            |          |
|                                              | 1.4. Is the interpretation of results sufficiently substantiated by data?                                                               |           |    |            |          |
|                                              | 1.5. Is there coherence between qualitative data sources, collection, analysis and interpretation?                                      |           |    |            |          |
| 2. Quantitative randomized controlled trials | 2.1. Is randomization appropriately performed?                                                                                          |           |    |            |          |
|                                              | 2.2. Are the groups comparable at baseline?                                                                                             |           |    |            |          |
|                                              | 2.3. Are there complete outcome data?                                                                                                   |           |    |            |          |
|                                              | 2.4. Are outcome assessors blinded to the intervention provided?                                                                        |           |    |            |          |
|                                              | 2.5 Did the participants adhere to the assigned intervention?                                                                           |           |    |            |          |
| 3. Quantitative non-randomized               | 3.1. Are the participants representative of the target population?                                                                      |           |    |            |          |
|                                              | 3.2. Are measurements appropriate regarding both the outcome and intervention (or exposure)?                                            |           |    |            |          |
|                                              | 3.3. Are there complete outcome data?                                                                                                   |           |    |            |          |
|                                              | 3.4. Are the confounders accounted for in the design and analysis?                                                                      |           |    |            |          |
|                                              | 3.5. During the study period, is the intervention administered (or exposure occurred) as intended?                                      |           |    |            |          |
| 4. Quantitative descriptive                  | 4.1. Is the sampling strategy relevant to address the research question?                                                                |           |    |            |          |
|                                              | 4.2. Is the sample representative of the target population?                                                                             |           |    |            |          |
|                                              | 4.3. Are the measurements appropriate?                                                                                                  |           |    |            |          |
|                                              | 4.4. Is the risk of nonresponse bias low?                                                                                               |           |    |            |          |
|                                              | 4.5. Is the statistical analysis appropriate to answer the research question?                                                           |           |    |            |          |
| 5. Mixed methods                             | 5.1. Is there an adequate rationale for using a mixed methods design to address the research question?                                  |           |    |            |          |
|                                              | 5.2. Are the different components of the study effectively integrated to answer the research question?                                  |           |    |            |          |
|                                              | 5.3. Are the outputs of the integration of qualitative and quantitative components adequately interpreted?                              |           |    |            |          |
|                                              | 5.4. Are divergences and inconsistencies between quantitative and qualitative results adequately addressed?                             |           |    |            |          |
|                                              | 5.5. Do the different components of the study adhere to the quality criteria of each tradition of the methods involved?                 |           |    |            |          |

Hong QN, Pluye P, Fàbregues S, Bartlett G, Boardman F, Cargo M, Dagenais P, Gagnon M-P, Griffiths F, Nicolau B, O’Cathain A, Rousseau M-C, Vedel I. Mixed Methods Appraisal Tool (MMAT), version 2018. Registration of Copyright (#1148552), Canadian Intellectual Property Office, Industry Canada.
