# Supplementary figures and images for: Protocol for a scoping review of how people with ME/CFS use the internet
Source: HighWire-hosted journal article supplement (doi:10.1136/bmjopen-2023-076904), 2024-01-01

PRISMA Flow Chart

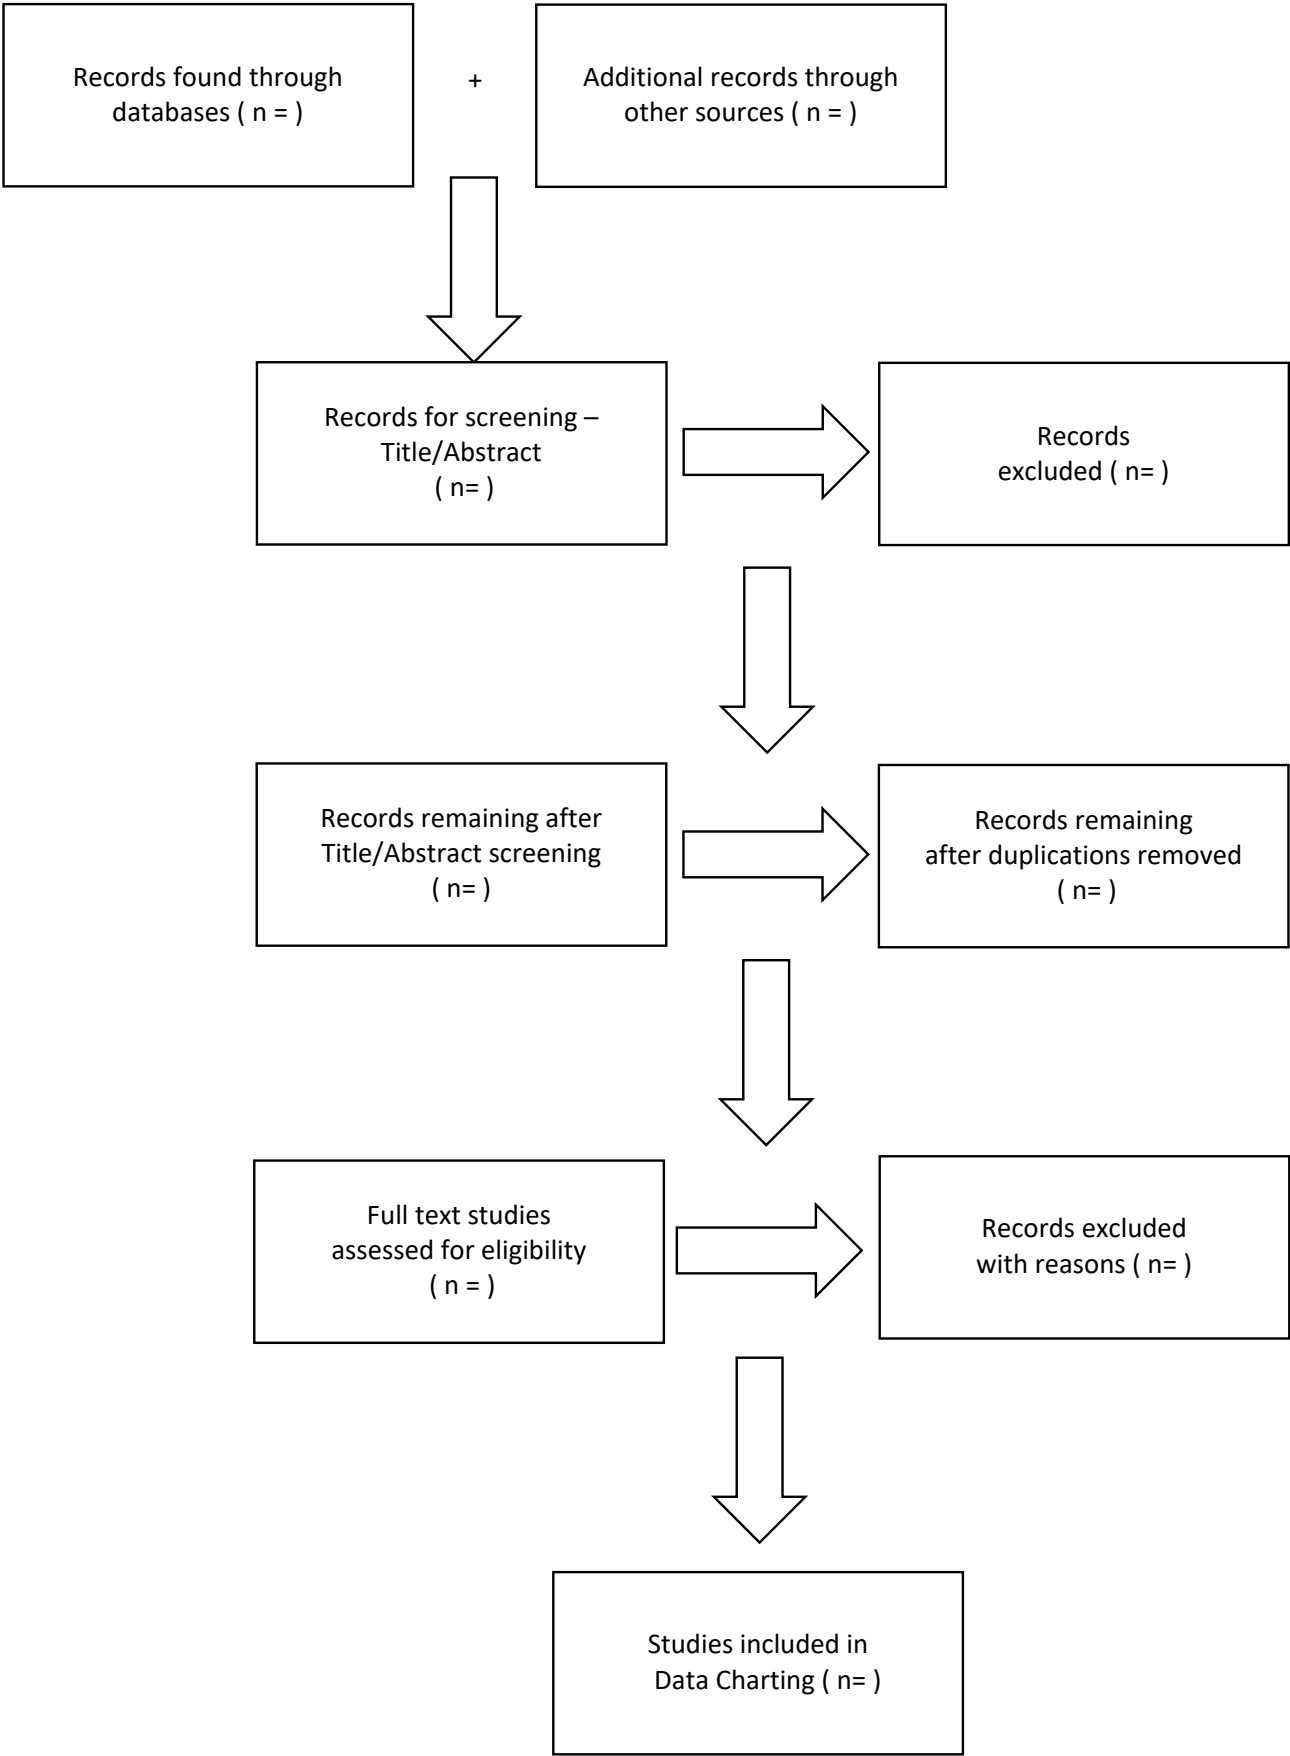

Supplement: bmjopen-2023-076904supp002_data_supplement.pdf [file bmjopen-2023-076904supp002_data_supplement.pdf]
